# Supplementary material for: Perceived Diet Quality, Eating Behaviour, and Lifestyle Changes in a Mexican Population with Internet Access during Confinement for the COVID-19 Pandemic: ESCAN-COVID19Mx Survey
Source: MDPI journal article supplement (doi:10.3390/nu13124256), 2021-11-26
Supplement: s1 [file s1]

**Supplementary material 1.** Survey on eating habits and lifestyle around the Coronavirus (Covid-19) pandemic in Mexico: ESCAN-COVID19Mx survey.

**Perceived diet quality, eating behaviour and lifestyle changes in a Mexican population with internet access during confinement for COVID-19 pandemic:  
ESCAN-COVID19Mx Survey**

Sophia E. Martínez-Vázquez\* , Marena Ceballos-Rasgado, Rafael Posada, Claudia Hunot-Alexander\*, Edna J. Nava-González, Ivonne Ramírez-Silva, Daisy Karina Aguilar-López, Gabriela Quiroz-Olguín, Beatriz López-Jara, Cristina Delgado-de-la-Cruz, Sol Huescas-Juárez, Mónica Silva, Martha Kaufer-Horwitz \*

\* Corresponding authors.

**Encuesta sobre hábitos de alimentación y estilo de vida alrededor de la pandemia de Coronavirus (Covid-19) en México.**

Selecciona la respuesta que más se acerque a tus hábitos durante estos días que has permanecido en tu domicilio por la contingencia de Coronavirus (COVID-19). En algunas secciones se puede seleccionar más de una respuesta.

**Sección 1. Datos generales**

**Contesta la siguiente información con tus datos generales**

1. Sexo

- Femenino
- Masculino

*Opción múltiple*

2. ¿Qué edad tienes?

*Texto de respuesta breve, número entre 18 y 99*

3. ¿Cuánto pesas aproximadamente (kg)?

*Texto de respuesta breve, número, es el número.*

4. ¿Cuánto mides aproximadamente (p.e: 1.60)?

*Texto de respuesta breve, número entre 0.90 y 2.10*

5. ¿Cuál es tu escolaridad (nivel máximo de estudios)?

- Sin estudios
- Primaria/Secundaria
- Bachillerato
- Licenciatura
- Posgrado

*Opción múltiple*

6. ¿Actualmente cuántas personas residen en tu domicilio incluyéndote a ti?

*Texto de respuesta breve, número entre 1 y 20*

7. ¿Cuántas personas aportan ingresos económicos en tu domicilio?

*Texto de respuesta breve, número entre 1 y 20*

8. ¿Hay en tu domicilio menores de edad?

- Sí
- No

*Opción múltiple*

9. Indica tu código postal Si no lo conoces, consulta aquí  
<http://www.correosdemexico.gob.mx/SSLServicios/ConsultaCP/Descarga.aspx>

*Texto de respuesta breve, número entre 00000 y 99999*

## **Sección 2. Calidad de la alimentación**

**Contesta las siguientes preguntas que hablan sobre tu alimentación.**

*Todas son de opción múltiple*

10. De acuerdo con el tiempo de aislamiento durante la contingencia y con tu ingreso, indica con cuál de las siguientes oraciones te identificas.

- No tengo ni tendré problemas económicos para comprar alimentos.
- Creo que puedo llegar a tener problemas económicos para comprar alimentos.
- Ya tengo problemas económicos para comprar alimentos.

11. ¿Consideras que tu alimentación era diferente ANTES de la contingencia?

- Sí (*va a la sección 2A, después continúa en sección 2 B*)
- No (*va a la sección 2B*)

Sección 2A. Contesta las siguientes preguntas que hablan sobre tu alimentación ANTES de la contingencia

*Todas son de opción múltiple*

12. ¿Bebías por lo menos 1.5 lts de agua natural al día?

- Sí
- No

13. ¿Consumías por lo menos, mínimo 200 g de verduras cocidas o crudas al día?

- Sí
- No

14. ¿Qué tipo de carne consumías con mayor frecuencia?

- Pollo
- Carne de res/cerdo
- Pescado
- No consumía carne

15. ¿Consumías pescado fresco o congelado (100 g) por lo menos una vez a la semana?

- Sí
- No

16. ¿Cuál era el tipo de grasa que consumías con mayor frecuencia en la semana?

- Aceites, aderezos y mayonesa
- Aceites, semillas y aguacate
- Mantecas, mantequillas, crema
- No sé

17. ¿Consumías por lo menos, 200 g de frutas al día?

- Sí
- No

18. ¿Consumías alimentos no preparados en casa 3 o más días a la semana?

- Sí
- No

19. ¿Consumías alimentos como frituras, embutidos, platillos empaquetados listos para calentar y servir) 2 o más días a la semana?

- Sí
- No

20. ¿Consumías postres o dulces comerciales 2 o más veces a la semana?

- Sí
- No

21. ¿Consumías leguminosas (haba, frijol, lenteja, garbanzo) por lo menos 3 días (300 g o 1 ½ tazas a la semana)?

- Sí
- No

22. ¿Qué tipo de cereales consumías con más frecuencia?

- Pastas, arroz, amaranto, avena, bolillo, telera o birote, tortillas
- Galletas, panes de dulce, pan de caja, tostadas fritas, pasteles empacados.
- No como trigo ni sus derivados

23. ¿Consumías 4 o más bebidas azucaradas (refrescos, aguas frescas con azúcar añadida) a la semana?

- Sí
- No

24. ¿Consumías al menos 200 ml de leche, yogurt, búlgaros o 100 gramos de quesos a la semana?

- Sí
- No

Sección 2B. Contesta las siguientes preguntas que hablan sobre tu alimentación DURANTE la contingencia

*Todas son de opción múltiple*

25. En la última semana ¿Has bebido por lo menos 1.5 lts de agua natural al día?

- Sí
- No

26. En la última semana ¿Has consumido por lo menos, mínimo 200 g de verduras cocidas o crudas al día?

- Sí
- No

27. En la última semana ¿Qué tipo de carne has consumido con mayor frecuencia?

- Pollo
- Carne de res/cerdo
- Pescado
- No consumo carne

28. En la última semana ¿Has consumido pescado fresco o congelado (100 g) por lo menos una vez?

- Sí
- No

29. ¿Cuál es el tipo de grasa que consumes con mayor frecuencia en la semana?

- Aceites, aderezos y mayonesa
- Aceites, semillas y aguacate
- Mantecas, mantequillas, crema
- No sé

30. En la última semana ¿Has consumido por lo menos, 200 g de frutas al día?

- Sí
- No

31. En la última semana ¿Has consumido alimentos no preparados en casa 3 o más días?

- Sí
- No

32. En la última semana ¿Has consumido alimentos como frituras, embutidos, platillos empaquetados listos para calentar y servir) 2 o más días?

- Sí
- No

33. En la última semana ¿Has consumido postres o dulces comerciales 2 o más veces?

- Sí
- No

34. En la última semana ¿Has consumido leguminosas (haba, frijol, lenteja, garbanzo) por lo menos 3 días (300 g o 1 ½ tazas a la semana)?

- Sí
- No

35. En la última semana ¿Qué tipo de cereales has consumido con más frecuencia?

- Pastas, arroz, amaranto, avena, bolillo, telera o birote, tortillas
- Galletas, panes de dulce, pan de caja, tostadas fritas, pasteles empacados.
- No como trigo ni sus derivados

36. En la última semana ¿Has consumido 4 o más bebidas azucaradas (refrescos, aguas frescas con azúcar añadida)?

- Sí
- No

37. En la última semana ¿Has consumido al menos 200 ml de leche, yogurt, búlgaros o 100 gramos de quesos?

- Sí
- No

38. De acuerdo a lo que acabas de responder, ¿consideras que tu alimentación era diferente antes de la contingencia?

- Sí, consumía más alimentos industrializados y comida rápida
- Sí, consumía más alimentos naturales y verduras
- No, era igual

Sección 2C. Responde lo siguiente

*Todas son de opción múltiple*

39. ¿Cuánto dinero destinas ahora a la compra de alimentos por semana?

- Menos de 500 pesos
- Entre 500 y 1,000 pesos
- Entre 1,000 y 1,500 pesos
- Entre 1,500 y 2,000 pesos
- Más de 2,000 pesos

40. El gasto en tus alimentos a partir de esta contingencia ha sido

- Menor al habitual
- Igual al habitual
- Mayor al habitual

41. El ingreso familiar derivado de la contingencia ha sido

- Menor al habitual
- Igual al habitual
- Mayor al habitual

**Sección 3. Estilo de vida**

**Responde las siguientes preguntas que se refieren a tu estilo de vida antes y durante la contingencia.**

42. ¿Qué tan preocupada/o te encuentras sobre tu salud durante esta contingencia?

- Muy preocupado
- Preocupado
- Poco preocupado

- Nada preocupado

*Opción múltiple*

43. ¿Cuáles son los medios de comunicación en los que te informas sobre temas de salud?

Puedes elegir varias opciones

- Redes sociales
- Páginas web
- Radio
- Televisión
- Periódicos
- Conversación con amigos/familiares/médicos

*Casillas de verificación*

44. ¿Cuáles son las fuentes de esos medios donde te informas sobre temas de salud?

Puedes elegir varias opciones

- Familiares, amigos
- Líder en salud / profesionales de la salud
- Programas de temas diversos
- Autoridades de gobierno y de instituciones de salud

*Casillas de verificación*

45. Selecciona la opción con la que más te identifiques:

- Durante este periodo de contingencia sigo haciendo mi vida normal
- Sólo salgo a la calle si tengo necesidad
- No salimos de casa, pedimos todo a domicilio

46. ¿Cuándo iniciaste el aislamiento voluntario en casa o cuarentena?

(dd/mm/aa)

*Fecha*



47. Durante este tiempo de contingencia considero que:

- He disminuido de peso
- Mi peso se ha mantenido
- He aumentado de peso entre 1 y 3 kg
- He aumentado de peso más de 4 kg
- No estoy seguro que mi peso haya cambiado
- Actualmente estoy embarazada

*Opción múltiple*

48. Durante este tiempo de contingencia consideras que tu hábito de fumar:

- Empecé a fumar
- Ha disminuido
- Se ha mantenido igual
- Ha aumentado
- He dejado de fumar
- No fumo ni fumaba

*Opción múltiple*

49. Durante este tiempo de contingencia consideras que tu consumo de bebidas alcohólicas:

- Empecé a consumir bebidas alcohólicas
- Ha disminuído
- Se ha mantenido igual
- Ha aumentado
- He dejado de consumir bebidas alcohólicas
- No consumo ni consumía bebidas alcohólicas

*Opción múltiple*

50. ¿Cuántas horas duermes al día?

*Texto de respuesta breve, número, entre 0 y 24*

51. Durante la contingencia, ¿Se han modificado tus horarios para dormir?

Puedes elegir varias opciones

- No, siguen siendo los mismos
- Sí, me duermo más temprano
- Sí, me duermo más tarde
- Sí, mi sueño nocturno es interrumpido con más frecuencia
- Sí, duermo más siestas de lo habitual
- Sí, tengo un horario de sueño muy cambiante

*Casillas de verificación*

52. Durante la contingencia, ¿Se han modificado tus horarios para despertarte?

- No, siguen siendo los mismos
- Sí, me despierto más temprano
- Sí, me despierto más tarde
- Sí, me despierto varias veces en la noche

*Opción múltiple*

53. Actualmente ¿cuántas horas pasas frente a las pantallas al día desarrollando actividades laborales y no laborales (incluye celular, computadora, tabletas, TV)?

*Texto de respuesta breve, número, entre 1 y 16*

54. Consideras que el tiempo que pasas frente a las pantallas durante la contingencia:

- Es el mismo que antes
- Ha disminuido
- Ha aumentado ligeramente
- Ha aumentado considerablemente

*Opción múltiple*

55. ¿Consideras que durante la contingencia has permanecido más horas continuas sentado/recostado que antes?

- Sí

- No

*Opción múltiple*

56. ¿Consumes alimentos frente a las pantallas?

- No, con mi familia o solo(a) (*Pasa a Sección 4*)
- Sí, pero sólo 1 vez al día (*pasa a pregunta 57*)
- Sí, 2 a 4 veces al día (*pasa a pregunta 57*)
- Si, en todo momento (*pasa a pregunta 57*)

*Opción múltiple*

57. ¿Qué alimentos consumes frente a las pantallas? (escribe en la línea lo más frecuente ejemplo: papas fritas, fruta, sándwich, palomitas)

*Texto de respuesta breve*

#### **Sección 4. Comer emocional**

**Responde las siguientes preguntas que se refieren a comer emocional**

58. Por favor, lee las siguientes afirmaciones e indica la respuesta que más represente tu forma de comer en estos momentos

|                                            | <b>Muy en<br/>desacuerdo</b> | <b>En<br/>desacuerdo</b> | <b>Ni en<br/>acuerdo,<br/>ni en<br/>desacuerdo</b> | <b>De<br/>acuerdo</b> | <b>Muy de<br/>acuerdo</b> |
|--------------------------------------------|------------------------------|--------------------------|----------------------------------------------------|-----------------------|---------------------------|
| Como MÁS cuando<br>estoy ansiosa (o)       |                              |                          |                                                    |                       |                           |
| Como MÁS cuando<br>estoy enojada (o)       |                              |                          |                                                    |                       |                           |
| Como MÁS cuando<br>estoy preocupada<br>(o) |                              |                          |                                                    |                       |                           |

|                                                     |  |  |  |  |  |
|-----------------------------------------------------|--|--|--|--|--|
| Como MÁS cuando estoy triste                        |  |  |  |  |  |
| Como MÁS cuando estoy irritada (o) o enfadada (o)   |  |  |  |  |  |
| Como MENOS cuando estoy ansiosa (o)                 |  |  |  |  |  |
| Como MENOS cuando estoy enojada (o)                 |  |  |  |  |  |
| Como MENOS cuando estoy preocupada (o)              |  |  |  |  |  |
| Como MENOS cuando estoy triste                      |  |  |  |  |  |
| Como MENOS cuando estoy irritada (o) o enfadada (o) |  |  |  |  |  |

*Cuadrícula de opción múltiple, requerir una respuesta en cada fila.*

59. De lo que acabas de responder, ¿crees que tus respuestas hubieran sido las mismas si hubieras contestado antes de la contingencia?

- No, hubieran sido diferentes
- Sí, hubieran sido las mismas

*Opción múltiple*

## **Sesión 5. Actividad Física**

**Contesta las siguientes preguntas en relación a tu actividad física antes y durante la contingencia.**

60. En el mes previo a la contingencia ¿con qué frecuencia realizaste 30 minutos o más de actividad física que fuera suficientemente intensa? (Deporte o ejercicio estructurado).

- Varias veces al día
- Diario
- 5-6 veces por semana
- 3-4 veces por semana
- 1-2 veces por semana
- No realizaba actividad física intensa

*Opción múltiple*

61. Durante la contingencia, en la última semana ¿has realizado 30 minutos o más de actividad física que fuera lo suficientemente intensa? (deporte o ejercicio estructurado)

- Varias veces al día
- Diario
- 5-6 veces por semana
- 3-4 veces por semana
- 1-2 veces por semana
- No he realizado actividad física intensa

*Opción múltiple*

62. Antes de la contingencia ¿Cuánto tiempo pasabas sentado/acostado durante un día hábil?

Sin considerar tus horas de sueño nocturno

*Texto de respuesta breve, número, entre 1 y 24*

63. Durante la contingencia, ¿Cuánto tiempo pasas sentado durante un día hábil?

*Texto de respuesta breve, número, entre 1 y 24*

Has llegado al final de la encuesta, muchas gracias por tomar el tiempo para contestarla.

Si te interesaría ser contactado/a en el futuro en caso de que queramos hacer un seguimiento, podrías dejar tu correo a continuación

*Texto de respuesta breve, no obligatoria.*

**En cursiva: formato de respuesta en Google Forms.**
